# Supplementary material for: Mouse p53-Deficient Cancer Models as Platforms for Obtaining Genomic Predictors of Human Cancer Clinical Outcomes
Source: PLoS One. 2012 Aug 7;7(8):e42494. doi: 10.1371/journal.pone.0042494 (PMC3413665; doi:10.1371/journal.pone.0042494)
Supplement: Table S1 — Mouse mammary and lung adenocarcinoma models used to validate the 682-gene signature. (XLS) [file pone.0042494.s011.xls]

## Sheet: Hoja1
Table S1. Mouse mammary and lung adenocarcinoma models used to validate the 682-gene signature.
Cancer type	GEO Id First Author	Number of samples	Tissue Type	Sample name	Genotype	Inducer/repressor	Mouse strain
Skin carcinoma	GSE11990	5	Skin Tissue	Normal	Non transgenic		FVB
	Garcia-Escudero	7	Carcinoma	p53DEC	p53fl/fl;K14Cre		FVB
		8	Carcinoma	p53DEC;pRbDEC	p53fl/fl;pRbfl/fl;K14Cre		FVB
	GSE19616	4	Skin Tissue	Normal	Non transgenic		FVB
	Garcia-Escudero	7	Carcinoma	p53DEC	p53fl/fl;K14Cre		FVB
		5	Carcinoma	p53DEC;pRbDEC	p53fl/fl;pRbfl/fl;K14Cre		FVB
Mammary carcinoma	GSE15119	3	Mammary gland	Normal	Non transgenic		FVB/N
	Eilon	7	Carcinoma	Stat5 CA	Stat5 CA		FVB/N
		6	Carcinoma	Stat5 D750	Stat5 D750		FVB/N
	GSE21444	5	Mammary gland	Normal	Non transgenic		Balb/C
	Kretschmer	5	Mammary gland	Normal	WAP-TNP8		Balb/C
		5	Carcinoma	WAP-TNP8 1 month	WAP-TNP8		Balb/C
		5	Carcinoma	WAP-TNP8 2 month	WAP-TNP8		Balb/C
		5	Carcinoma	WAP-TNP8 3 month	WAP-TNP8		Balb/C
		5	Carcinoma	WAP-TNP8 4 month	WAP-TNP8		Balb/C
		5	Carcinoma	WAP-TNP8 5 month	WAP-TNP8		Balb/C
		5	Carcinoma	WAP-TNP8 carcinoma	WAP-TNP8		Balb/C
	GSE20465	25	Mammary gland	Normal	TetO-NeuNT	Dox	FVB
	Schoenherr	25	Carcinoma	Her2/Neu	MMTV-rtTA/TetO-NeuNT	Dox	FVB
	GSE23938	5	Mammary gland	Normal	Non transgenic		FVB
	Zhu	4	Carcinoma	c-myc	MMTV-C-Myc		FVB
		5	Carcinoma	Her2/Neu	MMTV-Her2/Neu		FVB
		5	Carcinoma	Hras	MMTV-Hras		FVB
		6	Carcinoma	PymT	MMTV_PymT		FVB
		4	Carcinoma	Wnt	MMTV-Wnt1		FVB
		7	Carcinoma	p53-/-	p53fl/fl;MMTV-cre transplant		Balb/C
		5	Carcinoma	Brca-/-;p53+/-	BRCA1fl/fl;p53+/-;MMTV-cre		129B6/FVB
		5	Carcinoma	C3(1)Tag	C3(1)/SV40 T/t-antigens		FVB
	GSE15904	21	Carcinoma	Neu	MMTV-Neu		na
	Andrechek	25	Carcinoma	c-myc-T58A	MMTV-Myc-T58A		na
		80	Carcinoma	c-myc	MMTV-Myc		na
Lung adenocarcinoma	GSE17373	10	Lung Tissue	Normal	CCSP-rtTA	Dox	FVB
	Regales	4	Carcinoma	EGFRL858R	CCSP-rtTA; TetO-EGFRL858R	Dox	FVB
		4	Carcinoma	EGFRT790R	CCSP-rtTA; TetO-EGFRT790R	Dox	FVB
		5	Carcinoma	EGFRT790R_L858R	CCSP-rtTA; TetO-EGFRT790R_L858R	Dox	FVB
	GSE14449	4	Carcinoma	Kras/p53R172H	KrasLA1/+; p53R172HΔG/+		na
	Gibbons	9	Metastasis	Kras/p53R172H	KrasLA1/+; p53R172HΔG/+		na
	GSE6135	5	Carcinoma	Kras	LSL-K-rasG12D	AdenoCre	~75% C57Bl/6, ~25% FVB/n and 129SvEv
	Ji	5	Carcinoma	Kras/p53L/L	LSL-K-rasG12D;p53L/L	AdenoCre	~75% C57Bl/6, ~25% FVB/n and 129SvEv
		2	Carcinoma	Kras/p16IInk4a-/-	LSL-K-rasG12D; p16Ink4a-/-	AdenoCre	~75% C57Bl/6, ~25% FVB/n and 129SvEv
		3	Carcinoma	Kras/Lkb1L/L	LSL-K-rasG12D; Lkb1L/L	AdenoCre	~75% C57Bl/6, ~25% FVB/n and 129SvEv
		2	Carcinoma	Kras/Lkb1L/+	LSL-K-rasG12D; Lkb1L/+	AdenoCre	~75% C57Bl/6, ~25% FVB/n and 129SvEv
		2	Carcinoma	Kras/Lkb1L/-	LSL-K-rasG12D; Lkb1L/-	AdenoCre	~75% C57Bl/6, ~25% FVB/n and 129SvEv
	GSE21581	9	Carcinoma	Kras	LSL-K-rasG12D	AdenoCre	~75% C57Bl/6, ~25% FVB/n and 129SvEv
	Carretero	9	Carcinoma	Kras/Lkb1L/L	LSL-K-rasG12D; Lkb1L/L	AdenoCre	~75% C57Bl/6, ~25% FVB/n and 129SvEv
		17	Metastasis	Kras/Lkb1L/L	LSL-K-rasG12D; Lkb1L/L	AdenoCre	~75% C57Bl/6, ~25% FVB/n and 129SvEv
	GSE23874	6	Carcinoma	Kras/p53LSL/LSL	KrasLA2/+;Trp53LSL/LSL;Rosa26CreERT2	Tamoxifen	C57/B6-129SvJae
	Feldser	4	Adenoma	Kras/p53LSL/LSL	KrasLA2/+;Trp53LSL/LSL;Rosa26CreERT2	Tamoxifen	C57/B6-129SvJae
		4	Carcinoma	Kras/p53LSL/LSL	KrasLA2/+;Trp53LSL/LSL;Rosa26CreERT2		C57/B6-129SvJae
		4	Adenoma	Kras/p53LSL/LSL	KrasLA2/+;Trp53LSL/LSL;Rosa26CreERT2		C57/B6-129SvJae
