# Supplementary material for: Mouse p53-Deficient Cancer Models as Platforms for Obtaining Genomic Predictors of Human Cancer Clinical Outcomes
Source: PLoS One. 2012 Aug 7;7(8):e42494. doi: 10.1371/journal.pone.0042494 (PMC3413665; doi:10.1371/journal.pone.0042494)
Supplement: Table S3 — Probesets corresponding to the 40-gene test, and associated Cox analysis. (XLS) [file pone.0042494.s013.xls]

## Sheet: Hoja1
Table S3. Probesets corresponding to the 40-gene test, and associated Cox analysis.
Probeset ID	Wald Statistic	Cox coeficient	p-value	Gene Symbol	Gene Name
220223_at	3.67994	0.528031	0.00023329	ATAD5	ATPase family, AAA domain containing 5
204092_s_at	3.05513	0.459048	0.00224965	AURKA	aurora kinase A
209464_at	3.15915	0.436994	0.00158231	AURKB	aurora kinase B
204531_s_at	3.7587	0.55427	0.0001708	BRCA1	breast cancer 1, early onset
211851_x_at	3.95566	0.583876	7.63e-05	BRCA1	breast cancer 1, early onset
203755_at	3.25458	0.534525	0.00113559	BUB1B	budding uninhibited by benzimidazoles 1 homolog beta (yeast)
212914_at	-3.76489	-0.721274	0.000166622	CBX7	chromobox homolog 7
202705_at	3.85975	0.615643	0.000113504	CCNB2	cyclin B2
221436_s_at	3.28083	0.372133	0.00103503	CDCA3	cell division cycle associated 3
203213_at	3.55797	0.636511	0.000373728	CDK1	cyclin-dependent kinase 1
203214_x_at	3.00928	0.481277	0.00261872	CDK1	cyclin-dependent kinase 1
209714_s_at	3.92684	0.676198	8.61e-05	CDKN3	cyclin-dependent kinase inhibitor 3
208424_s_at	3.42248	0.470805	0.000620526	CIAPIN1	cytokine induced apoptosis inhibitor 1
208968_s_at	3.77759	0.568616	0.000158354	CIAPIN1	cytokine induced apoptosis inhibitor 1
219000_s_at	3.14096	0.485039	0.00168395	DSCC1	defective in sister chromatid cohesion 1 homolog (S. cerevisiae)
208788_at	-3.05989	-0.528014	0.00221417	ELOVL5	ELOVL family member 5, elongation of long chain fatty acids (FEN1/Elo2, SUR4/Elo3-like, yeast)
218498_s_at	3.51199	0.357318	0.000444764	ERO1L	ERO1-like (S. cerevisiae)
207165_at	3.21385	0.487516	0.0013097	HMMR	hyaluronan-mediated motility receptor (RHAMM)
209709_s_at	3.36213	0.48965	0.000773449	HMMR	hyaluronan-mediated motility receptor (RHAMM)
210211_s_at	3.23721	0.757122	0.00120706	HSP90AA1	heat shock protein 90kDa alpha (cytosolic), class A member 1
211968_s_at	3.1208	0.708466	0.00180358	HSP90AA1	heat shock protein 90kDa alpha (cytosolic), class A member 1
211969_at	3.65519	0.740578	0.000256992	HSP90AA1	heat shock protein 90kDa alpha (cytosolic), class A member 1
214328_s_at	3.24017	0.56281	0.0011946	HSP90AA1	heat shock protein 90kDa alpha (cytosolic), class A member 1
204444_at	3.02159	0.466033	0.00251447	KIF11	kinesin family member 11
208433_s_at	3.07571	0.439758	0.0021	LRP8	low density lipoprotein receptor-related protein 8, apolipoprotein e receptor
203362_s_at	3.24139	0.497661	0.0011895	MAD2L1	MAD2 mitotic arrest deficient-like 1 (yeast)
220651_s_at	3.48366	0.41804	0.000494615	MCM10	minichromosome maintenance complex component 10
219004_s_at	3.70425	0.595534	0.000212014	MIS18A	MIS18 kinetochore protein homolog A (S. pombe)
218883_s_at	3.90085	0.800203	9.59e-05	MLF1IP	MLF1 interacting protein
218039_at	3.34521	0.673871	0.000822191	NUSAP1	nucleolar and spindle associated protein 1
209940_at	-4.70065	-0.893388	2.59e-06	PARP3	poly (ADP-ribose) polymerase family, member 3
219148_at	3.17892	0.484611	0.00147827	PBK	PDZ binding kinase
202240_at	3.28944	0.373836	0.00100388	PLK1	polo-like kinase 1
222077_s_at	3.62873	0.635049	0.000284819	RACGAP1	Rac GTPase activating protein 1
203145_at	3.08397	0.368584	0.00204258	SPAG5	sperm associated antigen 5
201519_at	3.12735	0.499867	0.00176391	TOMM70A	translocase of outer mitochondrial membrane 70 homolog A (S. cerevisiae)
201291_s_at	3.35464	0.601769	0.000794696	TOP2A	topoisomerase (DNA) II alpha 170kDa
201292_at	3.47791	0.618566	0.000505331	TOP2A	topoisomerase (DNA) II alpha 170kDa
204033_at	3.51721	0.47879	0.000436109	TRIP13	thyroid hormone receptor interactor 13
202954_at	3.4673	0.535022	0.00052572	UBE2C	ubiquitin-conjugating enzyme E2C
